# Supplementary material for: Effect of Different Dietary Patterns on Macronutrient Composition in Human Breast Milk: A Systematic Review and Meta-Analysis
Source: MDPI journal article supplement (doi:10.3390/nu15030485), 2023-01-17
Supplement: s1 [file s1]

### Supplyment 1. Inclusion criteria and exclusion criteria of article selection (PICOS)

| Parametar    | Inclusion criteria                                                                                                                                                       | Exclusion criteria                                                                                                                                                                                |
|--------------|--------------------------------------------------------------------------------------------------------------------------------------------------------------------------|---------------------------------------------------------------------------------------------------------------------------------------------------------------------------------------------------|
| Population   | Healthy lactation mothers of healthy term infants                                                                                                                        | The studies populations had specific diseases                                                                                                                                                     |
| Intervention | N/A                                                                                                                                                                      | N/A                                                                                                                                                                                               |
| Comparator   | N/A                                                                                                                                                                      | N/A                                                                                                                                                                                               |
| Outcomes     | Nutritional status(Macronutrients intake in varies dietary patterns);<br><br>Measured Macronutrients concentrations in breast milk(Mean values $\pm$ Standard Deviation) | the studies populations had specific diseases;<br><br>the studies were not related to dietary patterns or breast milk composition;<br><br>the studies data on energy supplying were not provided; |
| Study design | Crossing -sectional-study,RCTS                                                                                                                                           | Abstracts,articles without full texts                                                                                                                                                             |

**Supplyment 2. Meta regression values of human breastmilk (HM) contents with the three variables**

| Diatery pattern | Variable | Protein |              | Fat |              | Lactose |              |
|-----------------|----------|---------|--------------|-----|--------------|---------|--------------|
|                 | name     | P       | 95% CI       | P   | 95% CI       | P       | 95% CI       |
| HH              | ①        | .54     | [-.65,1.13]  | .44 | [-.35.71]    | .44     | [-0.94,0.45] |
|                 | ②        | .77     | [-3.39,2.63] | .49 | [-1.26,2.35] | .88     | [-2.19,2.52] |
|                 | ③        | .81     | [-1.10,1.36] | .58 | [-.92,.56]   | .67     | [-1.15,0.78] |
| RR              | ①        | --      | --           | --  | --           | --      | --           |
|                 | ②        | .42     | [-.18,.09]   | .91 | [-3.77,3.49] | .89     | [-1.79,1.96] |
|                 | ③        | .17     | [-.04,.14]   | .33 | [-2.29,1.06] | .36     | [-1.15,0.57] |
| RH              | ①        | .00*    | [-.48,1.04]  | .25 | [-.61,1.97]  | .65     | [-1.08,1.65] |
|                 | ②        | .79     | [-.36,0.45]  | .96 | [-1.54,1.48] | .74     | [-1.26,0.93] |
|                 | ③        | .00*    | [.29,1.00]   | .66 | [-1.17,1.72] | .39     | [-0.66,1.54] |

**Variable name** \*① Carbohydrate ② Analytical method ③ Region
